# Supplementary material for: Changes in Mental Health and Preventive Behaviors before and after COVID-19 Vaccination: A Propensity Score Matching (PSM) Study
Source: MDPI journal article supplement (doi:10.3390/vaccines9091044), 2021-09-19
Supplement: s1 [file s1]

## Supplementary Information

**Supplementary Table S1. The reliability and confirmatory analysis of corresponding scales were evaluated according to Cronbach's  $\alpha$  coefficient**

| Variable                     | Cronbach's $\alpha$ | $\chi^2/df$ | RMSEA  | CFI    | TLI    |
|------------------------------|---------------------|-------------|--------|--------|--------|
| HBM                          | 0.794               | 16.758      | 0.062  | 0.955  | 0.911  |
| Mental health                | 0.813               | 42.389      | 0.101  | 0.944  | 0.922  |
| Preventive behavior          | 0.835               | 31.277      | 0.086  | 0.949  | 0.929  |
| Suggested value for good fit | >0.700              | 2~5         | <0.060 | >0.900 | >0.900 |

**Footnote:** As shown, the Cronbach's  $\alpha$  coefficient was used to report the reliability of the scales. The confirmatory analysis (CFA) indexes selected to report the model fit were:  $\chi^2/df$ , Wheaton et al.'s relative/normed chi-square; RMSEA, the root mean square error approximation; CFI, the comparative fit index; TLI, the Tucker-Lewis index. The following cutoff criteria were used: (a) Cronbach's  $\alpha$  of 0.700 or greater; (b)  $\chi^2/df$  between 2 and 5; (c) RMSEA of 0.060 or less; (d) CFI of 0.900 or greater; and (e) TLI of 0.900 or greater.

Supplementary Table S2. Factors associated with the score of scales by multivariate linear regression.

| Variable                         | HBM scale |         |          | Mental health |         |          | Preventive behavior |         |          |
|----------------------------------|-----------|---------|----------|---------------|---------|----------|---------------------|---------|----------|
|                                  | <i>B</i>  | $\beta$ | <i>P</i> | <i>B</i>      | $\beta$ | <i>P</i> | <i>B</i>            | $\beta$ | <i>P</i> |
| Gender                           |           |         |          |               |         |          |                     |         |          |
| Male                             | ref       | ref     | ref      | NA            | NA      | NA       | ref                 | ref     | ref      |
| Female                           | 0.696     | 0.047   | 0.003    | NA            | NA      | NA       | 0.498               | 0.047   | 0.002    |
| Age                              | NA        | NA      | NA       | 0.033         | 0.062   | <0.001   | 0.023               | 0.047   | 0.005    |
| Education                        |           |         |          |               |         |          |                     |         |          |
| Junior high school and below     | ref       | ref     | ref      | ref           | ref     | ref      | ref                 | ref     | ref      |
| High school degree               | 1.806     | 0.103   | <0.001   | 0.022         | 0.002   | 0.937    | 0.173               | 0.014   | 0.519    |
| Bachelor’s degree                | 1.81      | 0.121   | <0.001   | -1.004        | -0.09   | <0.001   | -0.867              | -0.082  | 0.001    |
| Master’s degree or above         | 1.593     | 0.05    | 0.008    | -1.339        | -0.056  | 0.003    | -1.069              | -0.048  | 0.013    |
| Family per capita monthly income |           |         |          |               |         |          |                     |         |          |
| <5000                            | ref       | ref     | ref      | ref           | ref     | ref      | ref                 | ref     | ref      |
| 5000-10000                       | 1.459     | 0.095   | <0.001   | -0.213        | -0.019  | 0.302    | -0.099              | -0.009  | 0.611    |
| 10001-15000                      | 1.509     | 0.067   | <0.001   | -0.561        | -0.033  | 0.062    | -0.154              | -0.01   | 0.588    |
| >15000                           | 2.233     | 0.096   | <0.001   | -1.11         | -0.064  | <0.001   | -0.388              | -0.024  | 0.199    |
| Vaccination                      |           |         |          |               |         |          |                     |         |          |
| Pre-vaccination                  | NA        | NA      | NA       | ref           | ref     | ref      | ref                 | ref     | ref      |
| Post-vaccination                 | NA        | NA      | NA       | -0.616        | -0.055  | <0.001   | 0.617               | 0.059   | <0.001   |

Footnote: B, not standardized regression coefficient;  $\beta$ , standardized regression coefficient; NA, not available.

## Supplementary Materials --- Questionnaire used in the survey.

### Section A: Demographics

We will now ask you some questions about yourself.

A1. What is your gender?

- a. Male
- b. Female

A2. What is your age?

*(Numeric values from 18 to 80)*

A3. What is the highest level of education you have completed? If currently enrolled, mark the highest qualification received.

- a. Junior high school and below
- b. High school degree
- c. Bachelor's degree
- d. Master's degree or above

A4. What is your family per capita income?

- a. <5000 RMB
- b. 5000-10000 RMB
- c. 10001-15000 RMB
- d. >15000 RMB

A5. What is your current state of health?

- a. Very good

- b. Good
- c. General
- d. Poor
- e. Very poor

A6. Have you taken a flu vaccine in the last three years?

- a. No vaccination
- b. Irregular vaccination
- c. Regular vaccination

A7. In the past year, how often did you take domestic business trip in China?

- a. At least twice a month
- b. About once a month
- c. About once every 3 months
- d. About once every 6 months
- e. Barely

A8. In the past year, how often did you take foreign business trip out of China?

- a. At least once every 3 months
- b. About once every 6 months
- c. About once a year
- d. Barely

A9. When did you get the first shot of the COVID-19 vaccine?

- a. Just vaccinated
- b. More than 2 weeks

- c. Within 1 month
- d. Within 3 months
- e. Within 6 months

**Section B: Health belief model**

We will now ask you some questions about COVID-19 and vaccines in general. How strongly do you agree or disagree with each of the following statements?

| Rotate Statement                                                                             | Strongly disagree | Tend to disagree | Do not know | Tend to agree | Strongly agree |
|----------------------------------------------------------------------------------------------|-------------------|------------------|-------------|---------------|----------------|
| B1) I think I have a high probability of infecting COVID-19 in the next 12 months            | 1                 | 2                | 3           | 4             | 5              |
| B2) I think the children have a high probability of infecting COVID-19 in the next 12 months | 1                 | 2                | 3           | 4             | 5              |
| B3) I think the elderly have a high probability of infecting COVID-19 in the next 12 months  | 1                 | 2                | 3           | 4             | 5              |
| B4) I can't live a normal life like I did before COVID-19 pandemic                           | 1                 | 2                | 3           | 4             | 5              |
| B5) If I am infected with COVID-19, I will think the consequences will be very               | 1                 | 2                | 3           | 4             | 5              |

|                                                                                                             |   |   |   |   |   |
|-------------------------------------------------------------------------------------------------------------|---|---|---|---|---|
| serious                                                                                                     |   |   |   |   |   |
| B6) If I am infected with COVID-19, I think it is very likely to have long-term sequelae                    | 1 | 2 | 3 | 4 | 5 |
| B7) If the child in the family is infected with COVID-19, I think the consequences will be very serious     | 1 | 2 | 3 | 4 | 5 |
| B8) If the elderly in the family is infected with COVID-19, I think the consequences will be very serious   | 1 | 2 | 3 | 4 | 5 |
| B9) The novel coronavirus (COVID-19) has a strong ability to spread                                         | 1 | 2 | 3 | 4 | 5 |
| B10) A novel coronavirus vaccination can prevent COVID-19                                                   | 1 | 2 | 3 | 4 | 5 |
| B11) A coronavirus vaccine can reduce the severity of complications when people are infected with COVID-19. | 1 | 2 | 3 | 4 | 5 |
| B12) Getting the coronavirus vaccine can prevent people from spreading the COVID-19 to others               | 1 | 2 | 3 | 4 | 5 |
| B13) Overall, it is difficult to take COVID-19 vaccine at a community health                                | 5 | 4 | 3 | 2 | 1 |

|                                                                                                                           |   |   |   |   |   |
|---------------------------------------------------------------------------------------------------------------------------|---|---|---|---|---|
| center or a designated vaccination site                                                                                   |   |   |   |   |   |
| B14) Overall, I think getting coronavirus vaccine will cause a healthy person to be infected with COVID-19                | 5 | 4 | 3 | 2 | 1 |
| B15) Overall, I think there may be strong side effects after the COVID-19 vaccine                                         | 5 | 4 | 3 | 2 | 1 |
| B16) I was vaccinated against COVID-19 on the recommendation of the National Department of Disease Control and Prevention | 1 | 2 | 3 | 4 | 5 |
| B17) I was vaccinated against COVID-19 according to the advice of people around me (family, friends, colleagues).         | 1 | 2 | 3 | 4 | 5 |
| B18) I was vaccinated against COVID-19 according to the advice of doctors, community workers and other professionals.     | 1 | 2 | 3 | 4 | 5 |

**Section C: Questions about your recent mental health status.**

How strongly do you agree or disagree with each of the following statements?

| Rotate Statement | Strongly disagree | Tend to disagree | Do not know | Tend to agree | Strongly agree |
|------------------|-------------------|------------------|-------------|---------------|----------------|
|                  |                   |                  |             |               |                |

|                                                                                                   |   |   |   |   |   |
|---------------------------------------------------------------------------------------------------|---|---|---|---|---|
| C1) I don't think the COVID-19 pandemic will end soon                                             | 1 | 2 | 3 | 4 | 5 |
| C2) In the past month, my mental state has been negatively affected by the new coronary pneumonia | 1 | 2 | 3 | 4 | 5 |
| C3) In the past month, I have reduced my communication with my family or friends                  | 1 | 2 | 3 | 4 | 5 |
| C4) In the past month, my sleep quality has deteriorated                                          | 1 | 2 | 3 | 4 | 5 |
| C5) In the past month, I often feel depressed                                                     | 1 | 2 | 3 | 4 | 5 |
| C6) In the past month, I often have difficulty concentrating                                      | 1 | 2 | 3 | 4 | 5 |
| C7) In the past month, I often feel irritable                                                     | 1 | 2 | 3 | 4 | 5 |
| C8) I think going out to large gatherings puts everyone in danger                                 | 1 | 2 | 3 | 4 | 5 |
| C9) I feel very nervous when I hear people around me coughing or sneezing                         | 1 | 2 | 3 | 4 | 5 |

**Section D: Questions about your recent preventive behavior performance against COVID-19.**

How strongly do you agree or disagree with each of the following statements?

|                  |                   |                  |             |               |                |
|------------------|-------------------|------------------|-------------|---------------|----------------|
| Rotate Statement | Strongly disagree | Tend to disagree | Do not know | Tend to agree | Strongly agree |
|------------------|-------------------|------------------|-------------|---------------|----------------|



|                                                                                                             |   |   |   |   |   |
|-------------------------------------------------------------------------------------------------------------|---|---|---|---|---|
| D1) I will wear a mask as much as possible when I go out                                                    | 1 | 2 | 3 | 4 | 5 |
| D2) I will consciously maintain a certain social distance from others                                       | 1 | 2 | 3 | 4 | 5 |
| D3) When going out, I don't touch my eyes, nose and mouth directly with my hands                            | 1 | 2 | 3 | 4 | 5 |
| D4) I will wash my hands with soapy water or a disposable sanitizer when I touch something outside          | 1 | 2 | 3 | 4 | 5 |
| D5) I try not to touch my family or other things before washing my hands with soap and so on when I go home | 1 | 2 | 3 | 4 | 5 |
| D6) I try to reduce the use of public transport                                                             | 1 | 2 | 3 | 4 | 5 |
| D7) I reduced my daily social activities.                                                                   | 1 | 2 | 3 | 4 | 5 |
| D8) I reduced eating out                                                                                    | 1 | 2 | 3 | 4 | 5 |
| D9) When shopping I prefer online shopping, instead of going to crowded places like supermarkets            | 1 | 2 | 3 | 4 | 5 |
